# Supplementary material for: Half-sandwich Ru(ii) arene complexes bearing benzimidazole ligands for theN-alkylation reaction of aniline with alcohols in a solvent-free medium
Source: Royal Society of Chemistry journal article supplement (doi:10.1039/d1nj01539g), 2021-01-01
Supplement: d1nj01539g1.pdf [file d1nj01539g1.pdf]

## Supplementary Material

for

### Half-sandwich Ru(II) arene complexes that bearing benzimidazole ligands for the *N*-alkylation reaction of aniline with alcohols under solvent-free medium

Metin Çiçek,<sup>a,b</sup> Nevin Gürbüz,<sup>b,c</sup> Namık Özdemir,<sup>d</sup> İsmail Özdemir,<sup>b,c</sup> Esin İspir<sup>a</sup>

<sup>a</sup>*Department of Chemistry, Faculty of Science and Arts, Kahramanmaraş Sütçü İmam University, Kahramanmaraş, 46050–9, Turkey*

<sup>b</sup>*Catalysis Research and Application Center, İnönü University, 44280 Malatya, Turkey*

<sup>c</sup>*Department of Chemistry, Faculty of Science and Art, İnönü University, 44280 Malatya, Turkey*

<sup>d</sup>*Ondokuz Mayıs University, Faculty of Education, Department of Mathematics and Science Education, 9055139 Samsun, Turkey*

#### Content

|                                                                                 | Page |
|---------------------------------------------------------------------------------|------|
| <b>Figure 1.</b> <sup>1</sup> H and <sup>13</sup> C NMR spectrums of <b>1a</b>  | 3    |
| <b>Figure 2.</b> FT-IR spectrum of <b>1a</b>                                    | 4    |
| <b>Figure 3.</b> <sup>1</sup> H and <sup>13</sup> C NMR spectrums of <b>1b</b>  | 5    |
| <b>Figure 4.</b> FT-IR spectrum of <b>1b</b>                                    | 6    |
| <b>Figure 5.</b> <sup>1</sup> H and <sup>13</sup> C NMR spectrums of <b>1c</b>  | 7    |
| <b>Figure 6.</b> FT-IR spectrum of <b>1c</b>                                    | 8    |
| <b>Figure 7.</b> <sup>1</sup> H and <sup>13</sup> C NMR spectrums of <b>1d</b>  | 9    |
| <b>Figure 8.</b> FT-IR spectrum of <b>1d</b>                                    | 10   |
| <b>Figure 9.</b> <sup>1</sup> H and <sup>13</sup> C NMR spectrums of <b>1e</b>  | 11   |
| <b>Figure 10.</b> FT-IR spectrum of <b>1e</b>                                   | 12   |
| <b>Figure 11.</b> <sup>1</sup> H and <sup>13</sup> C NMR spectrums of <b>2a</b> | 13   |
| <b>Figure 12.</b> FT-IR spectrum of <b>2a</b>                                   | 14   |
| <b>Figure 13.</b> <sup>1</sup> H and <sup>13</sup> C NMR spectrums of <b>2b</b> | 15   |

|                                                                               |    |
|-------------------------------------------------------------------------------|----|
| <b>Figure 14.</b> FT-IR spectrum of <b>2b</b>                                 | 16 |
| <b>Figure 15.</b> $^1\text{H}$ and $^{13}\text{C}$ NMR spectrums of <b>2c</b> | 17 |
| <b>Figure 16.</b> FT-IR spectrum of <b>2c</b>                                 | 18 |
| <b>Figure 17.</b> $^1\text{H}$ and $^{13}\text{C}$ NMR spectrums of <b>2d</b> | 19 |
| <b>Figure 18.</b> FT-IR spectrum of <b>2d</b>                                 | 20 |
| <b>Figure 19.</b> $^1\text{H}$ and $^{13}\text{C}$ NMR spectrums of <b>2e</b> | 21 |
| <b>Figure 20.</b> FT-IR spectrum of <b>2e</b>                                 | 22 |

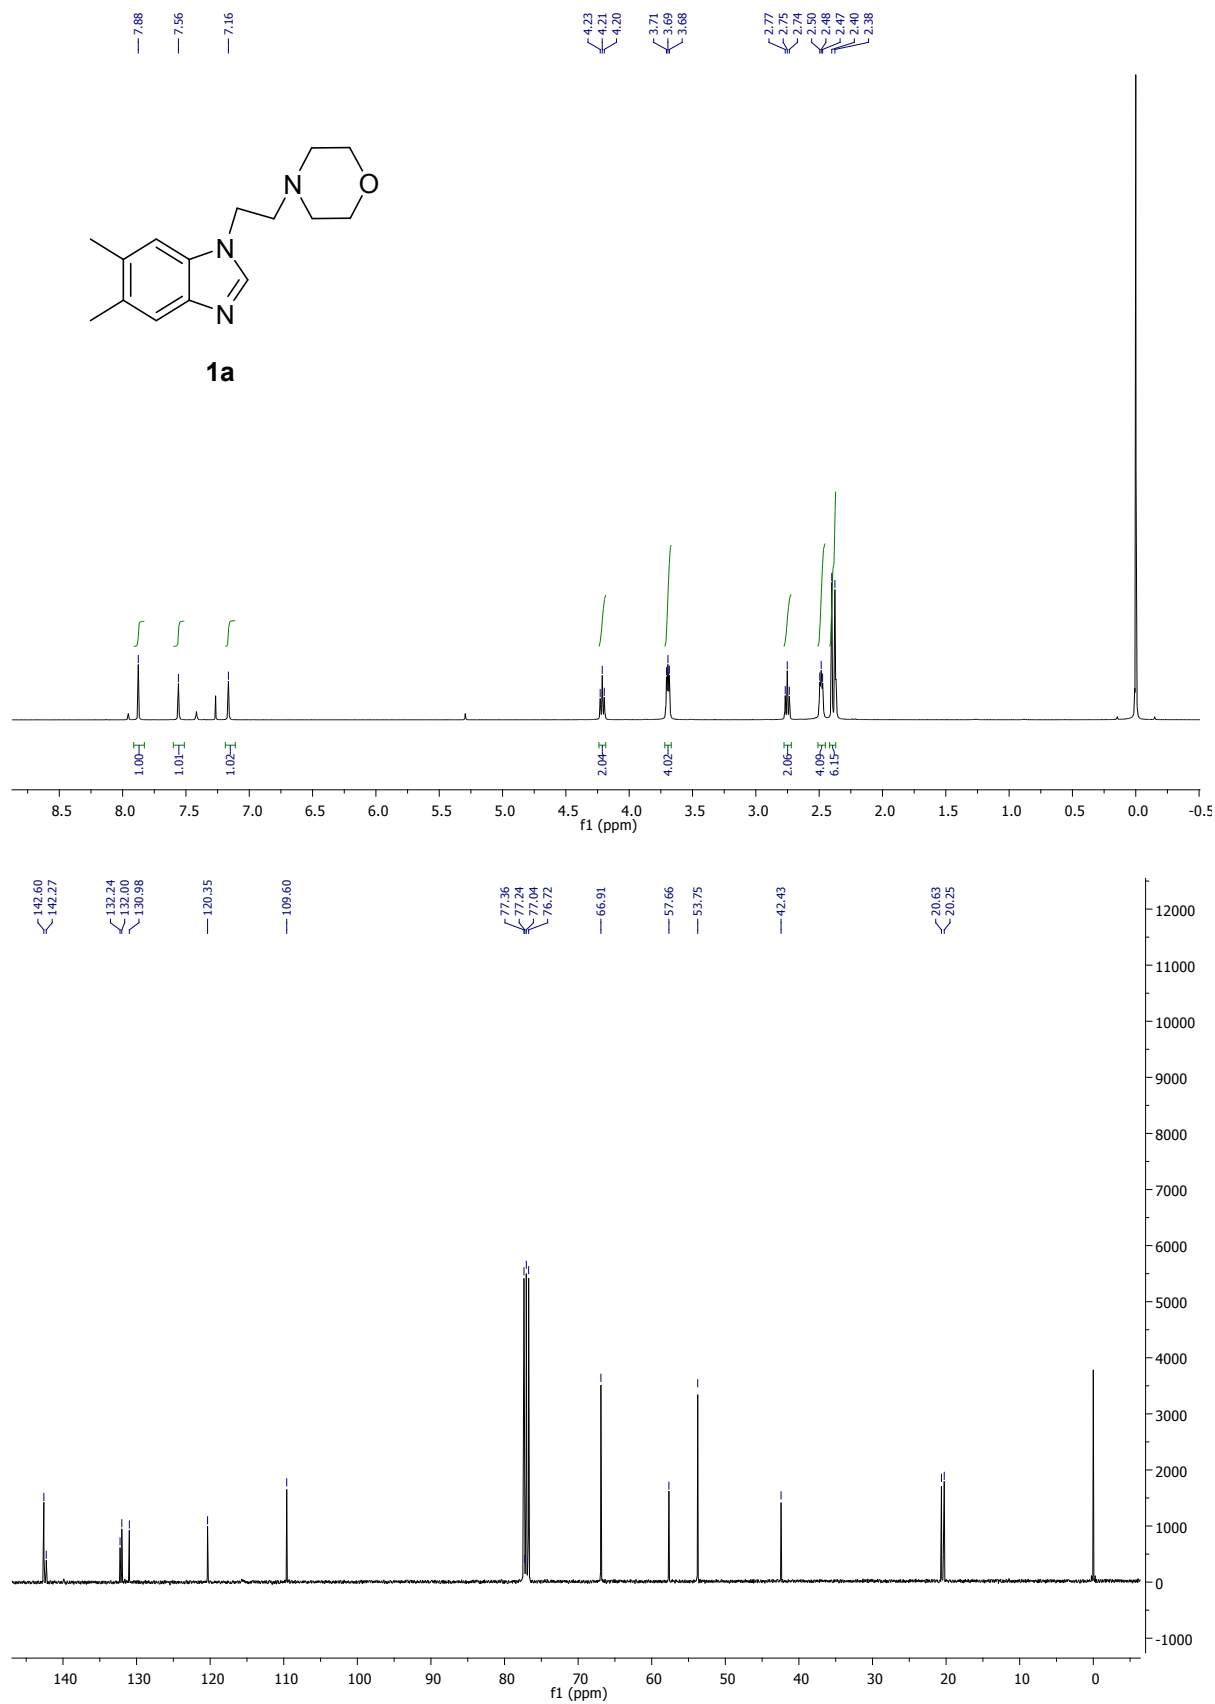

**Figure 1.** <sup>1</sup>H and <sup>13</sup>C NMR spectra of **1a**

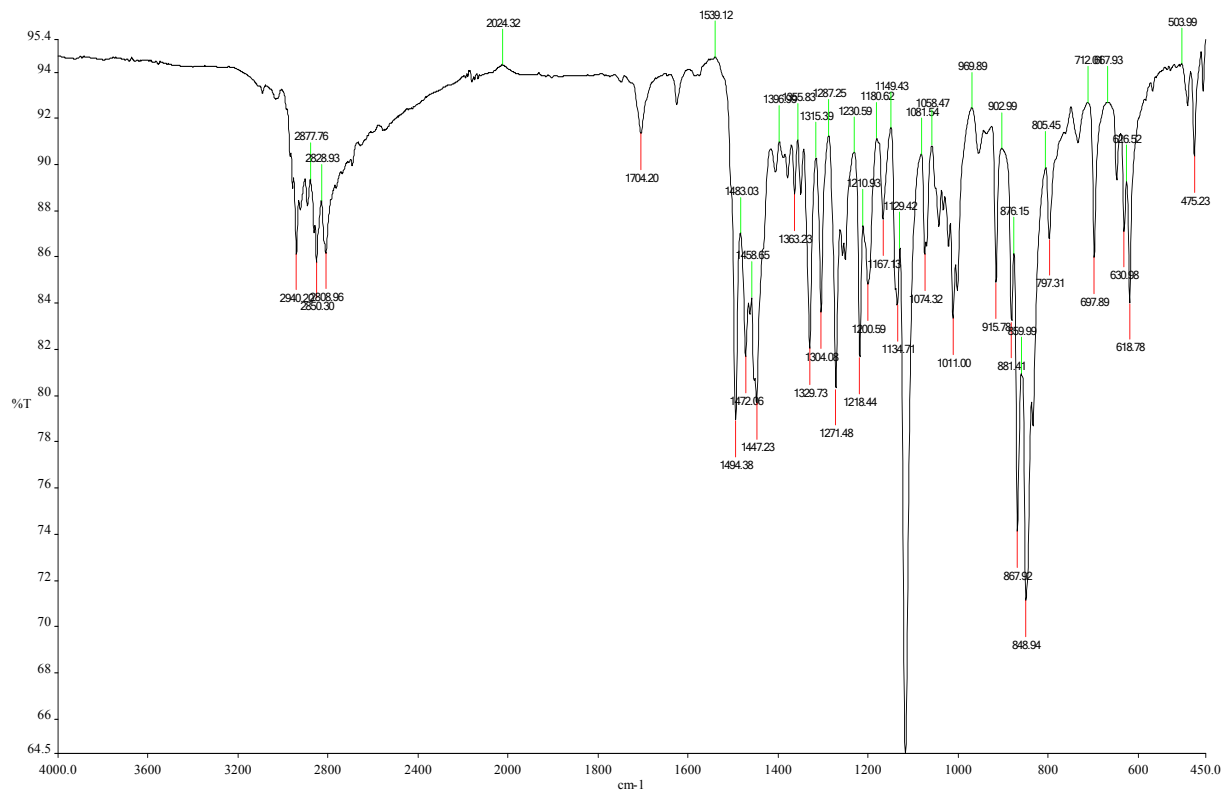

**Figure 2.** FT-IR spectrum of **1a**

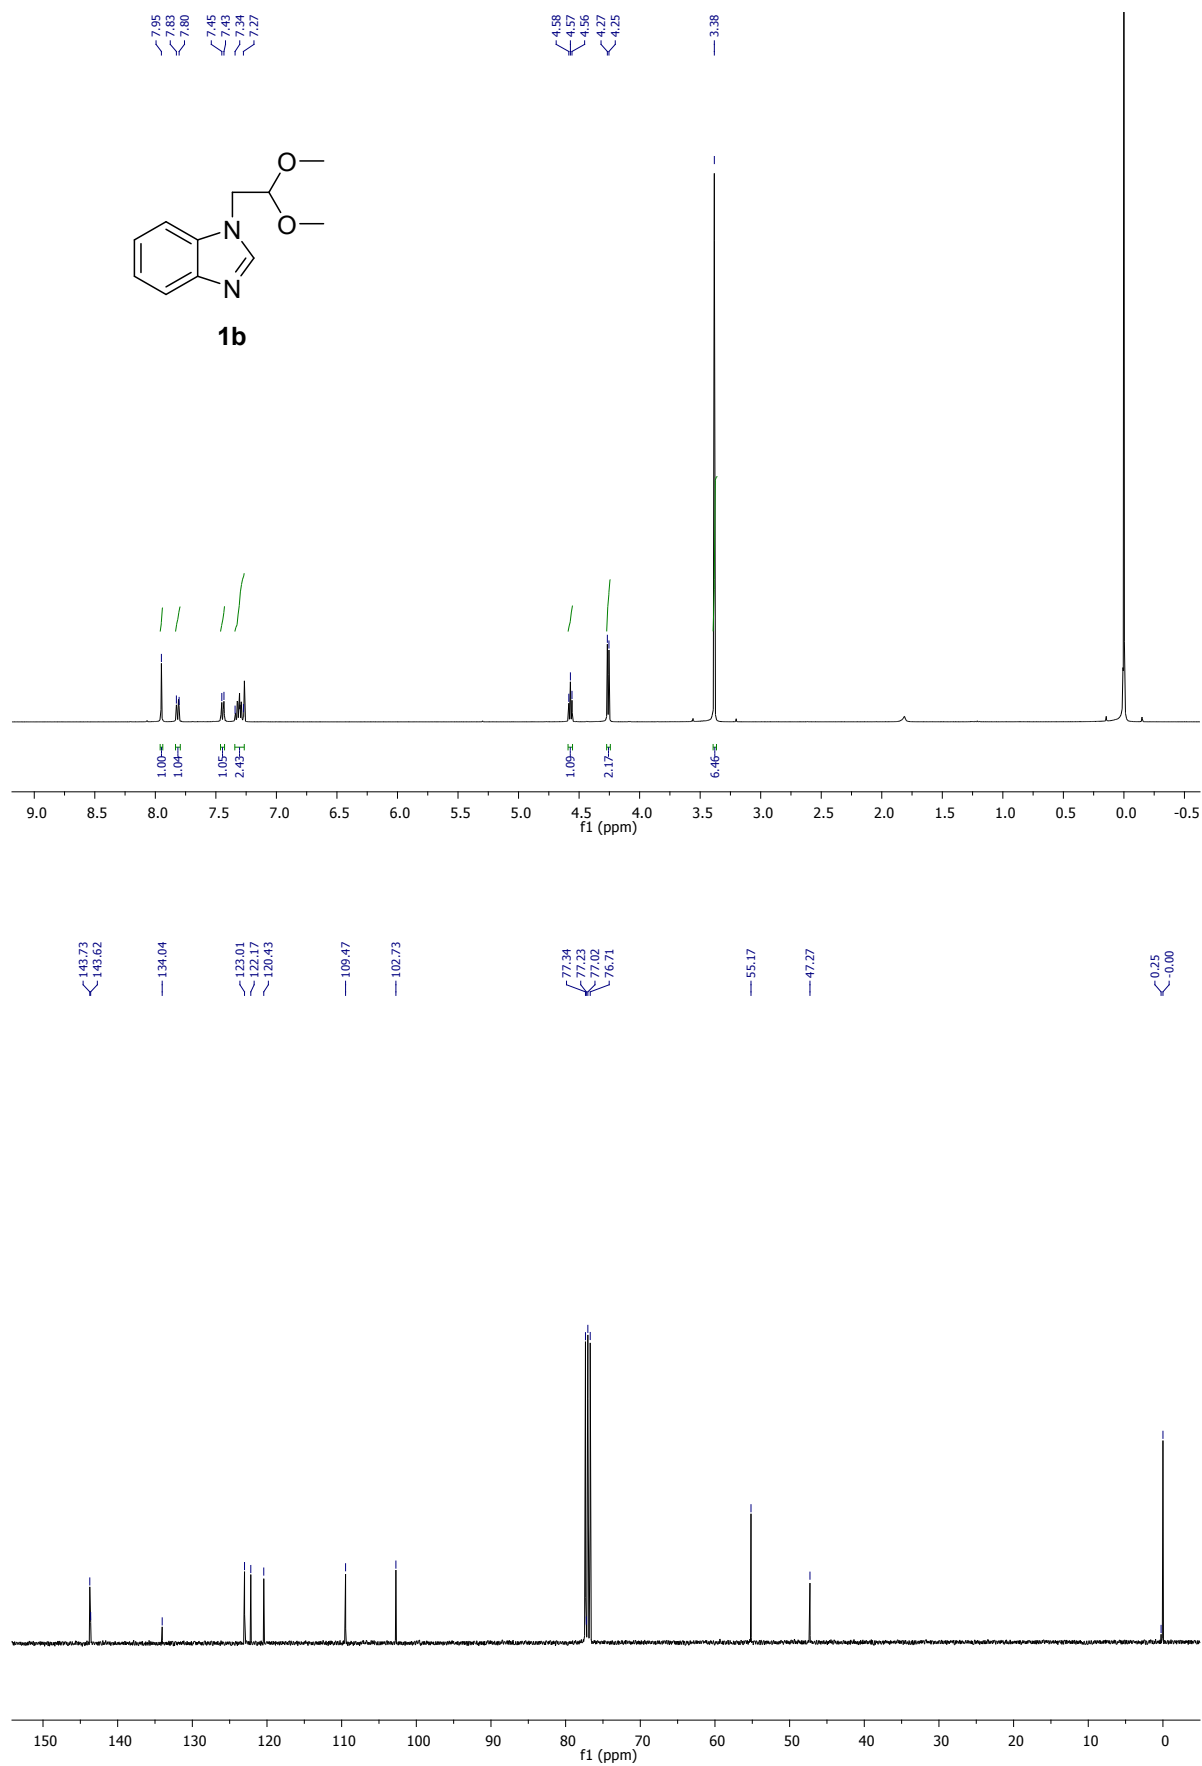

**Figure 3.** <sup>1</sup>H and <sup>13</sup>C NMR spectra of **1b**

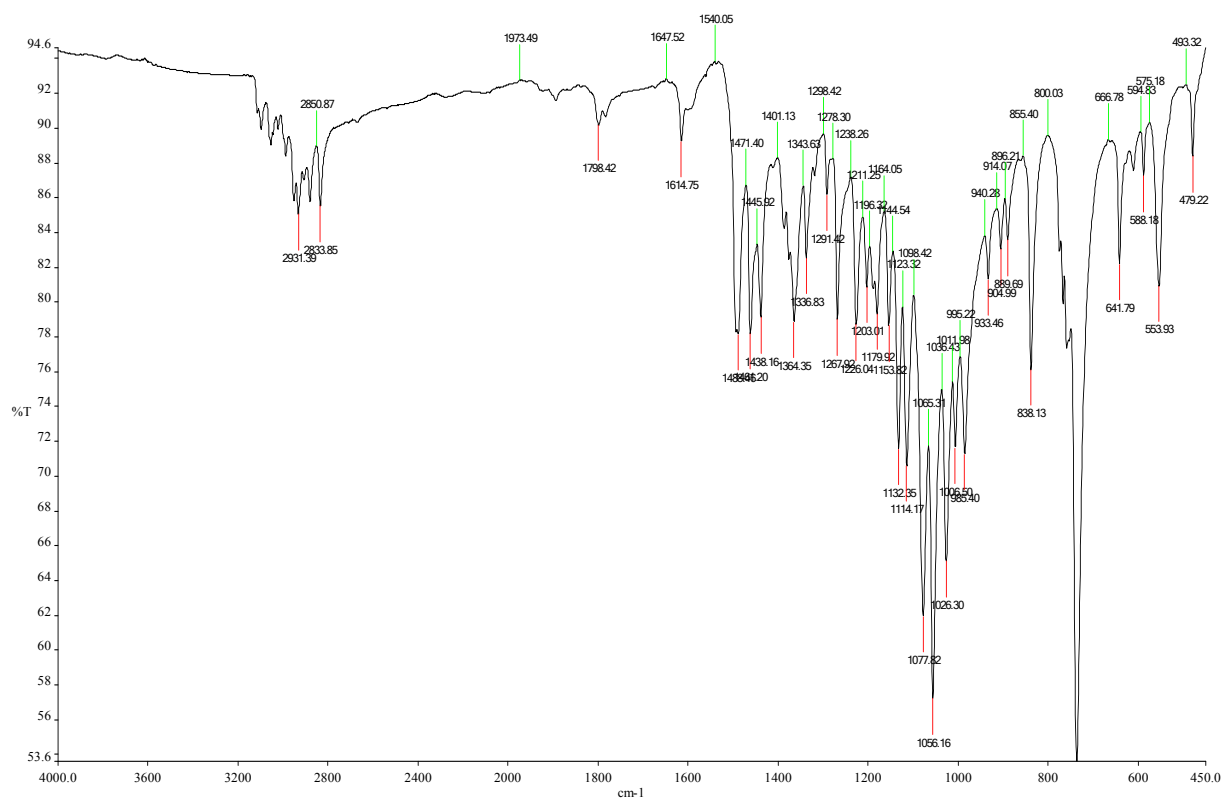

**Figure 4.** FT-IR spectrum of **1b**

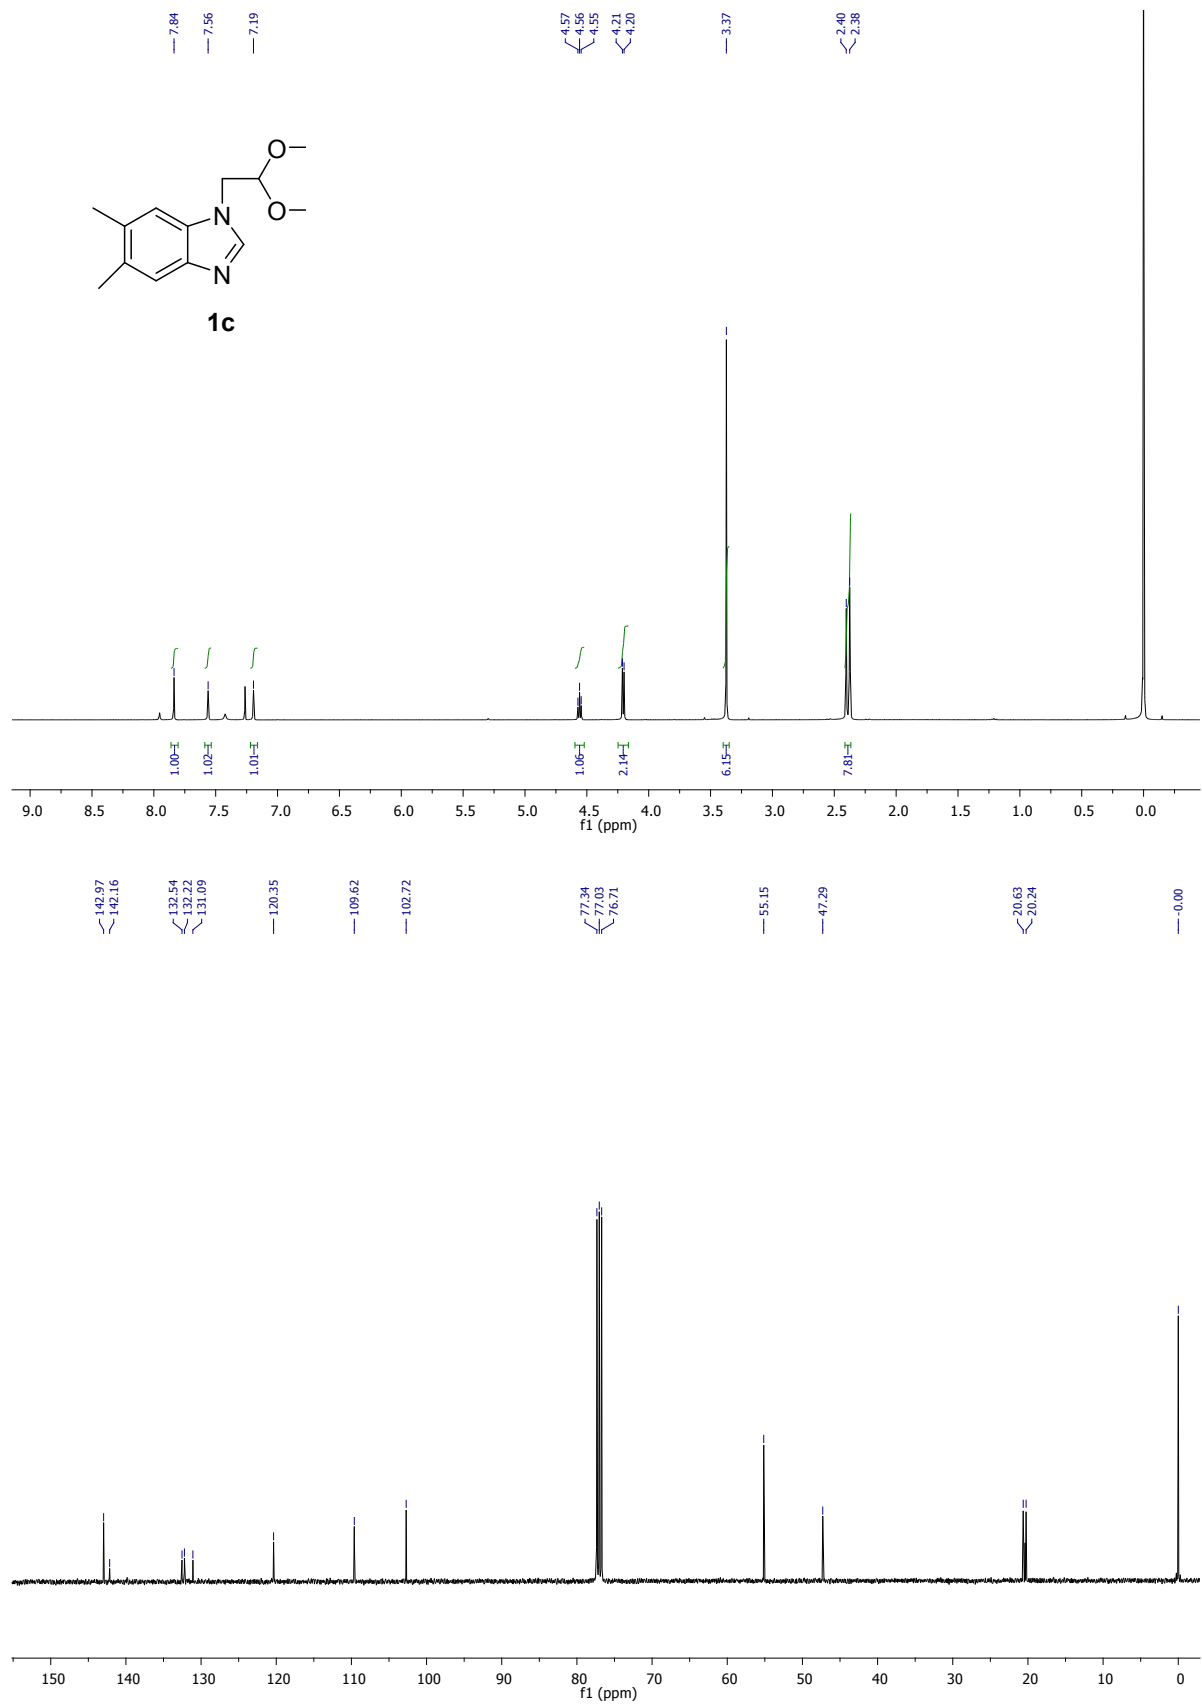

**Figure 5.** <sup>1</sup>H and <sup>13</sup>C NMR spectra of **1c**

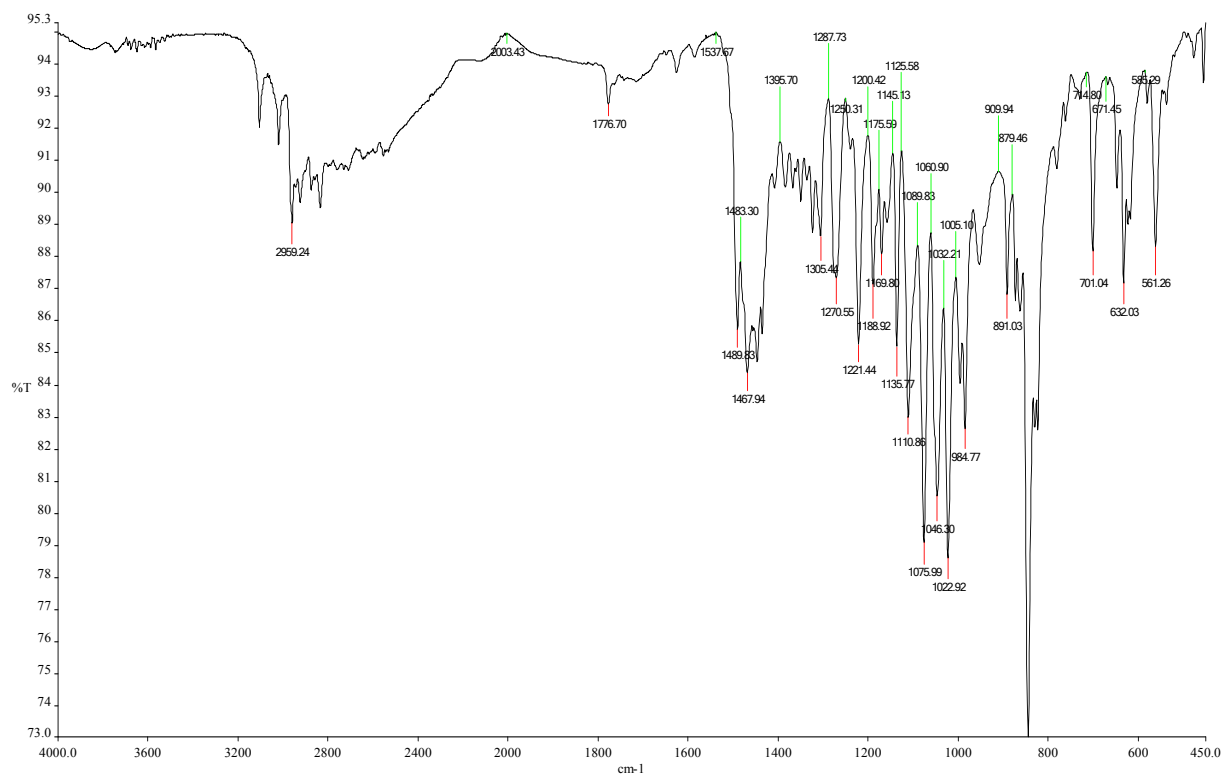

**Figure 6.** FT-IR spectrum of **1c**



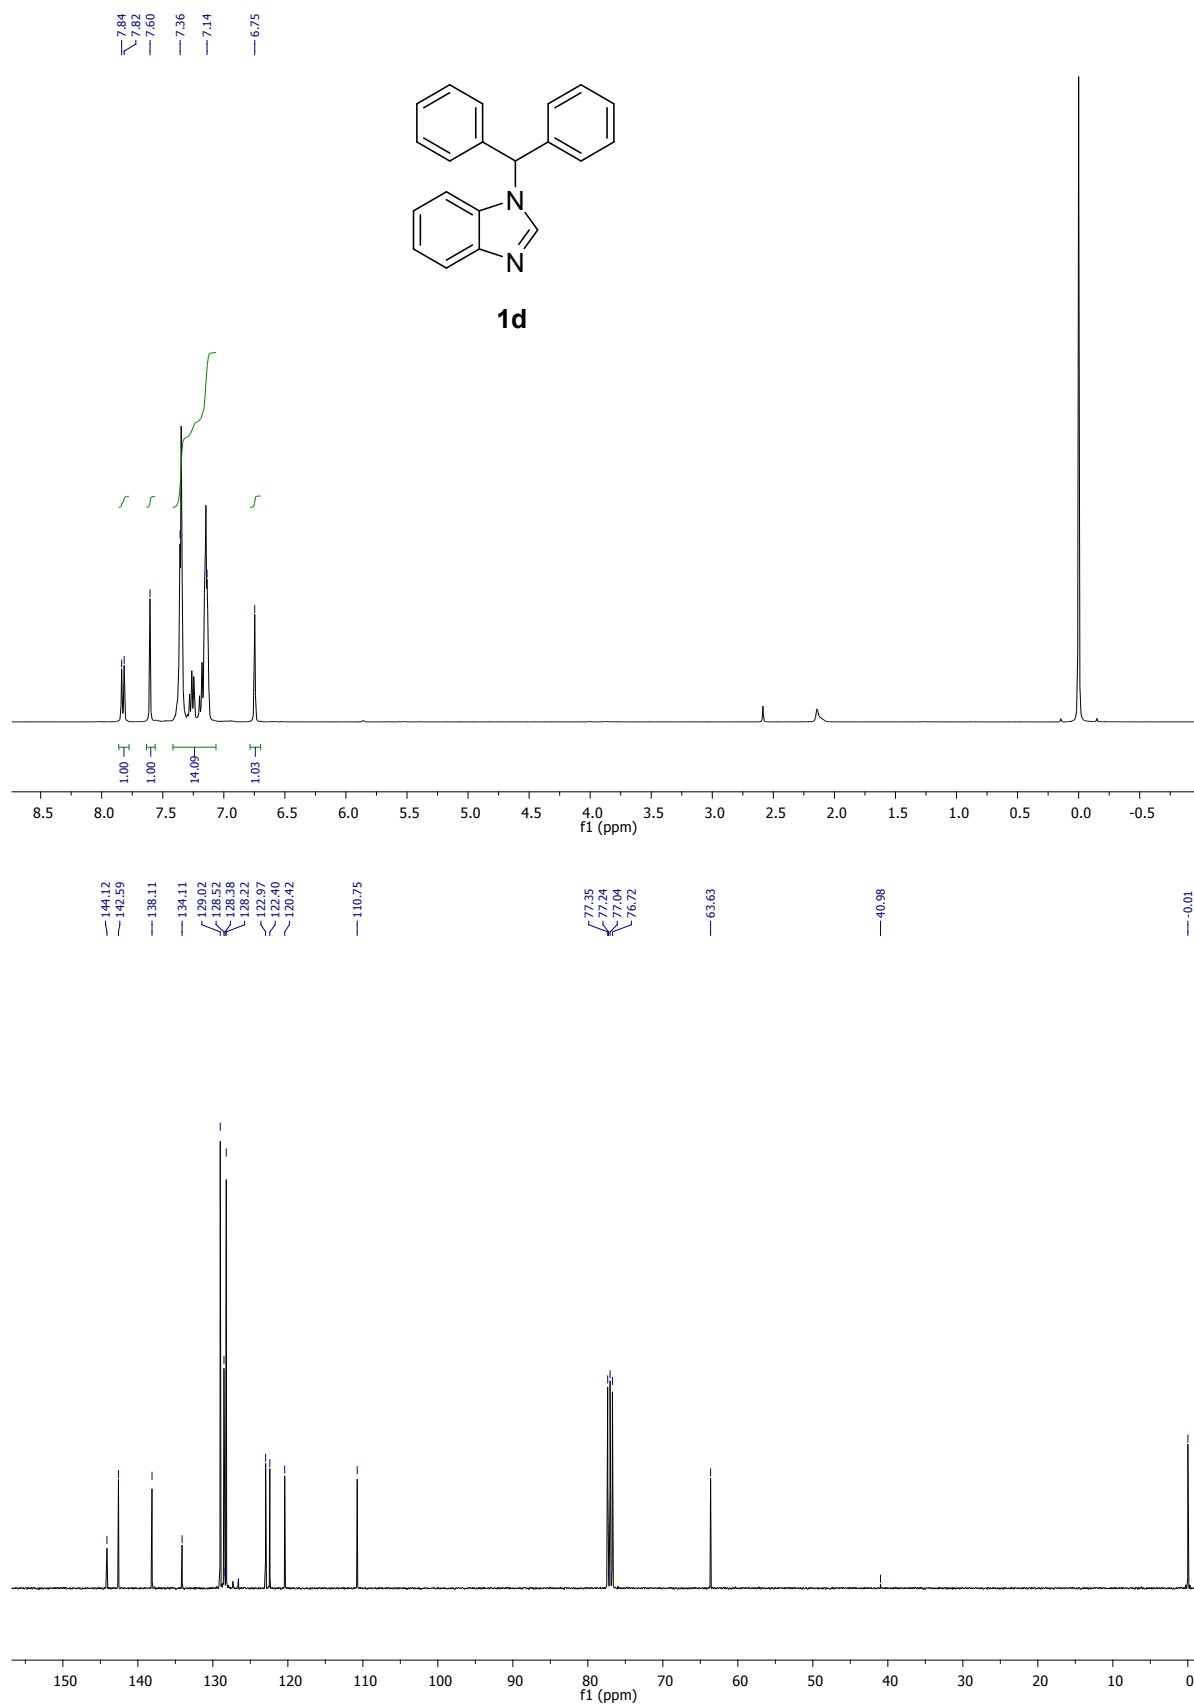

**Figure 7.**  $^1\text{H}$  and  $^{13}\text{C}$  NMR spectra of **1d**

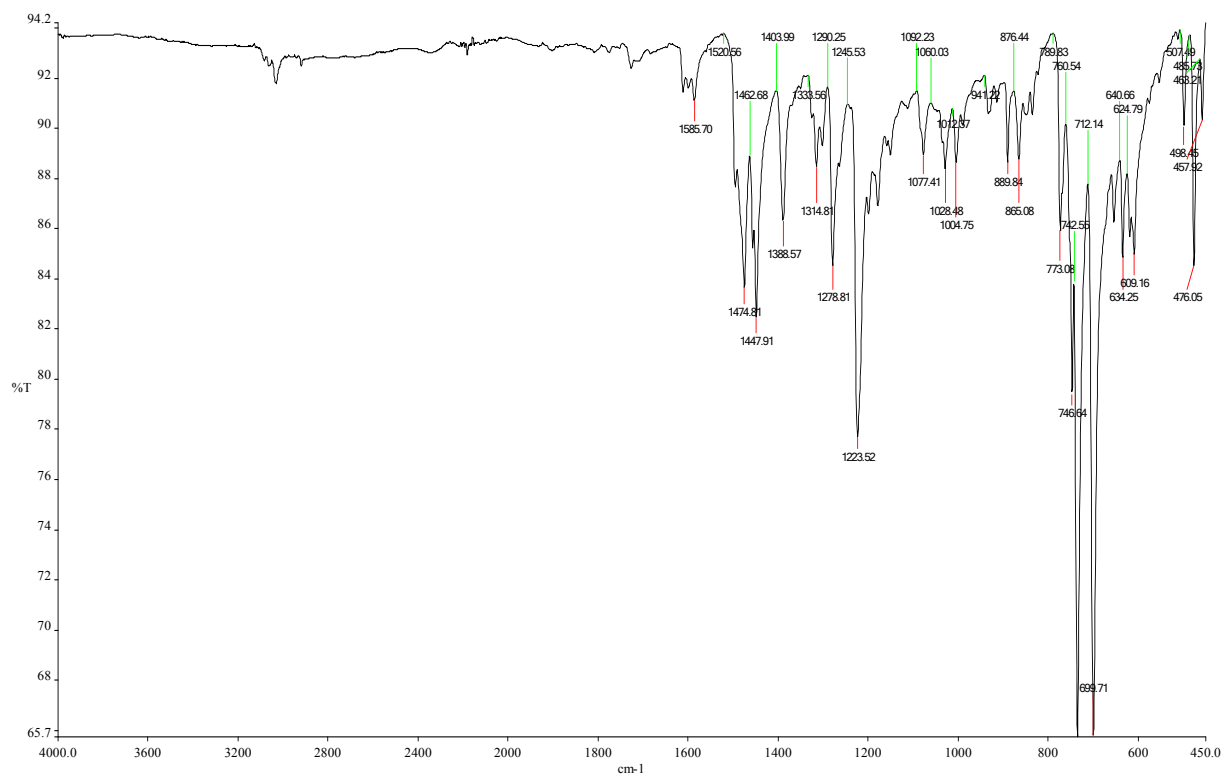

**Figure 8.** FT-IR spectrum of **1d**

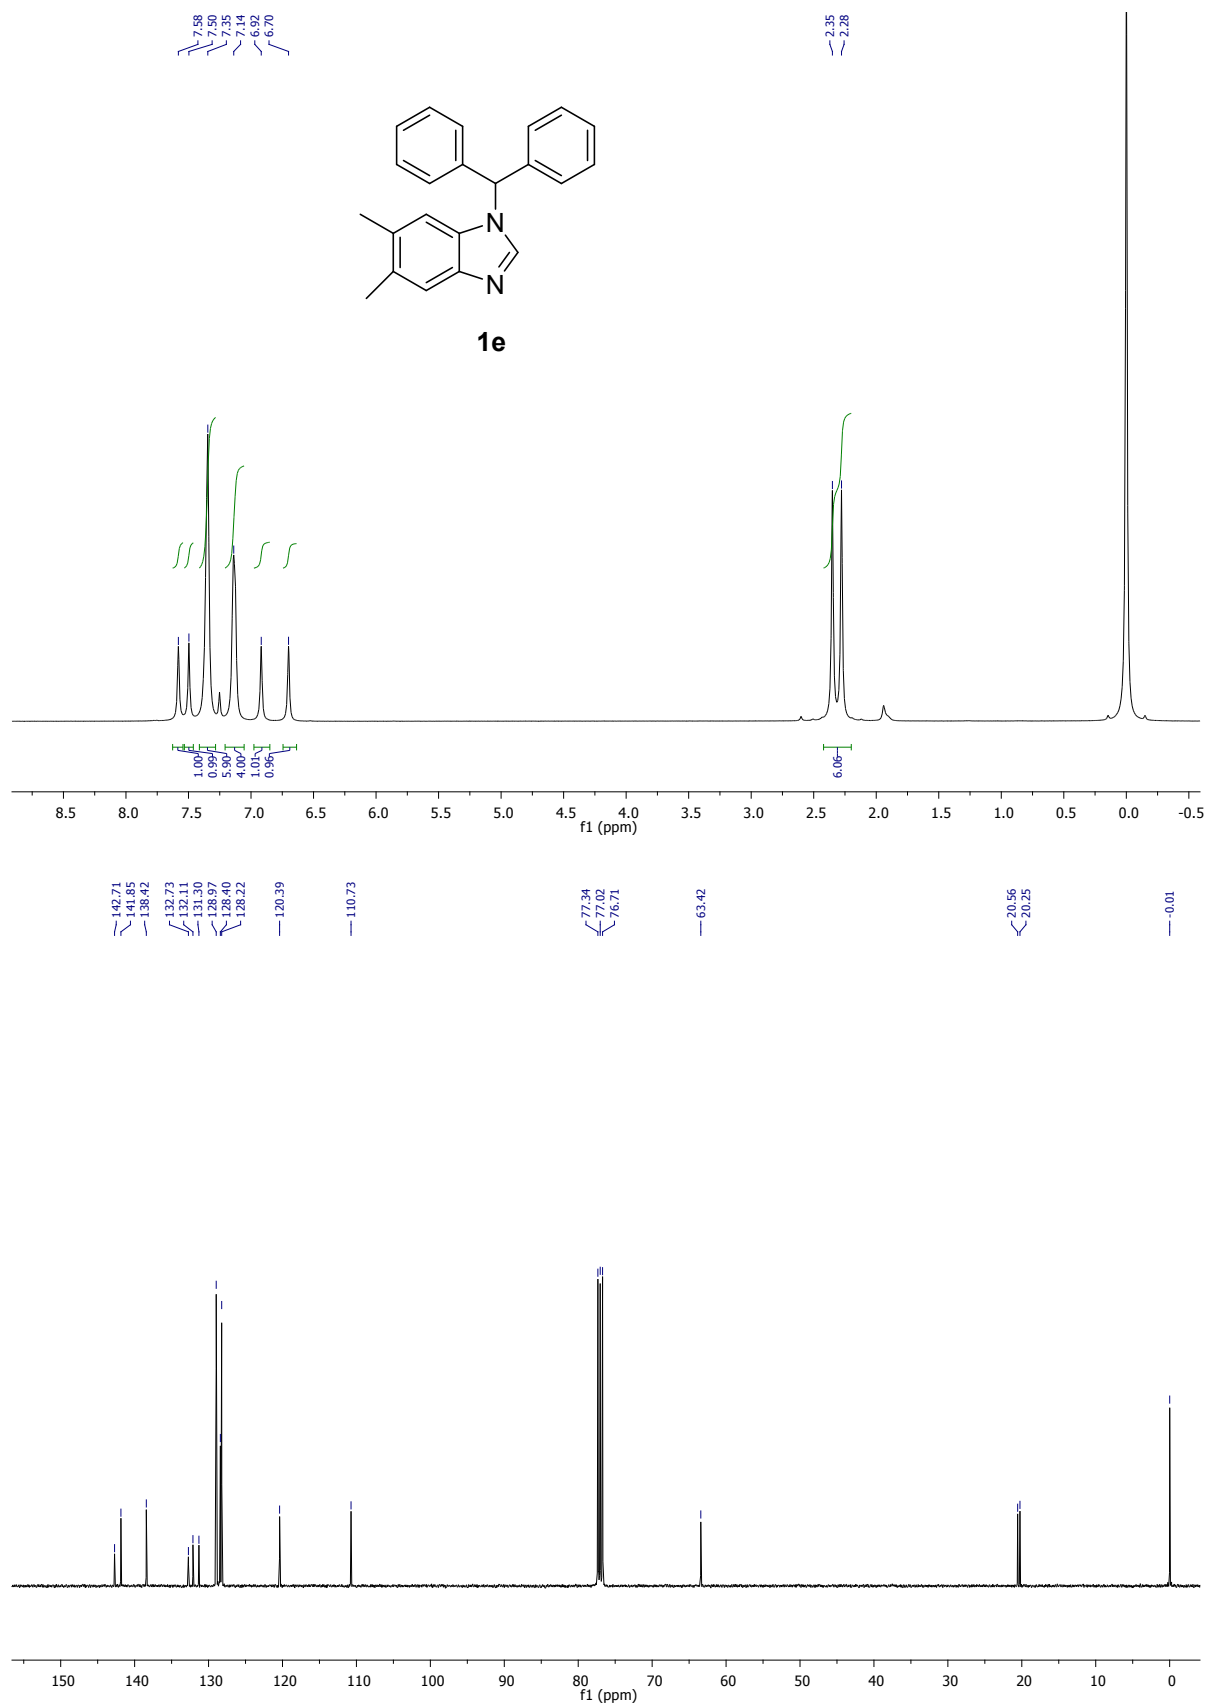

**Figure 9.** <sup>1</sup>H and <sup>13</sup>C NMR spectra of **1e**

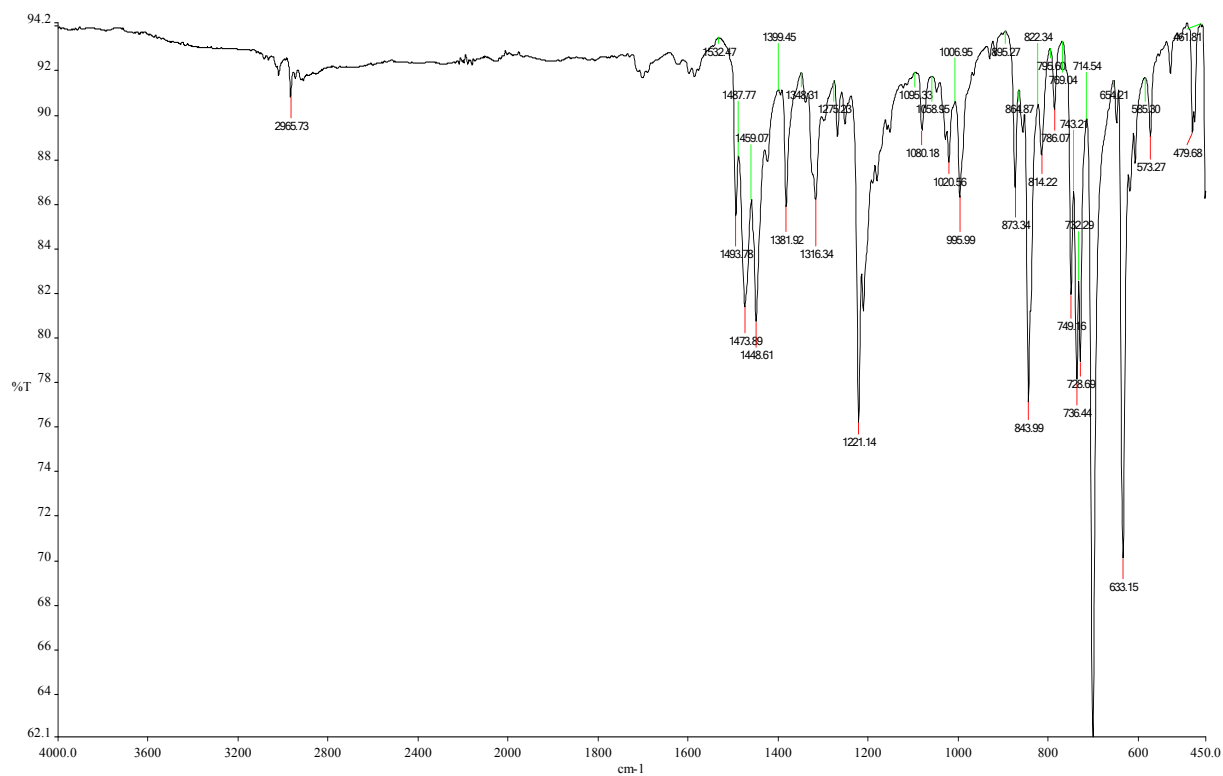

**Figure 10.** FT-IR spectrum of **1e**

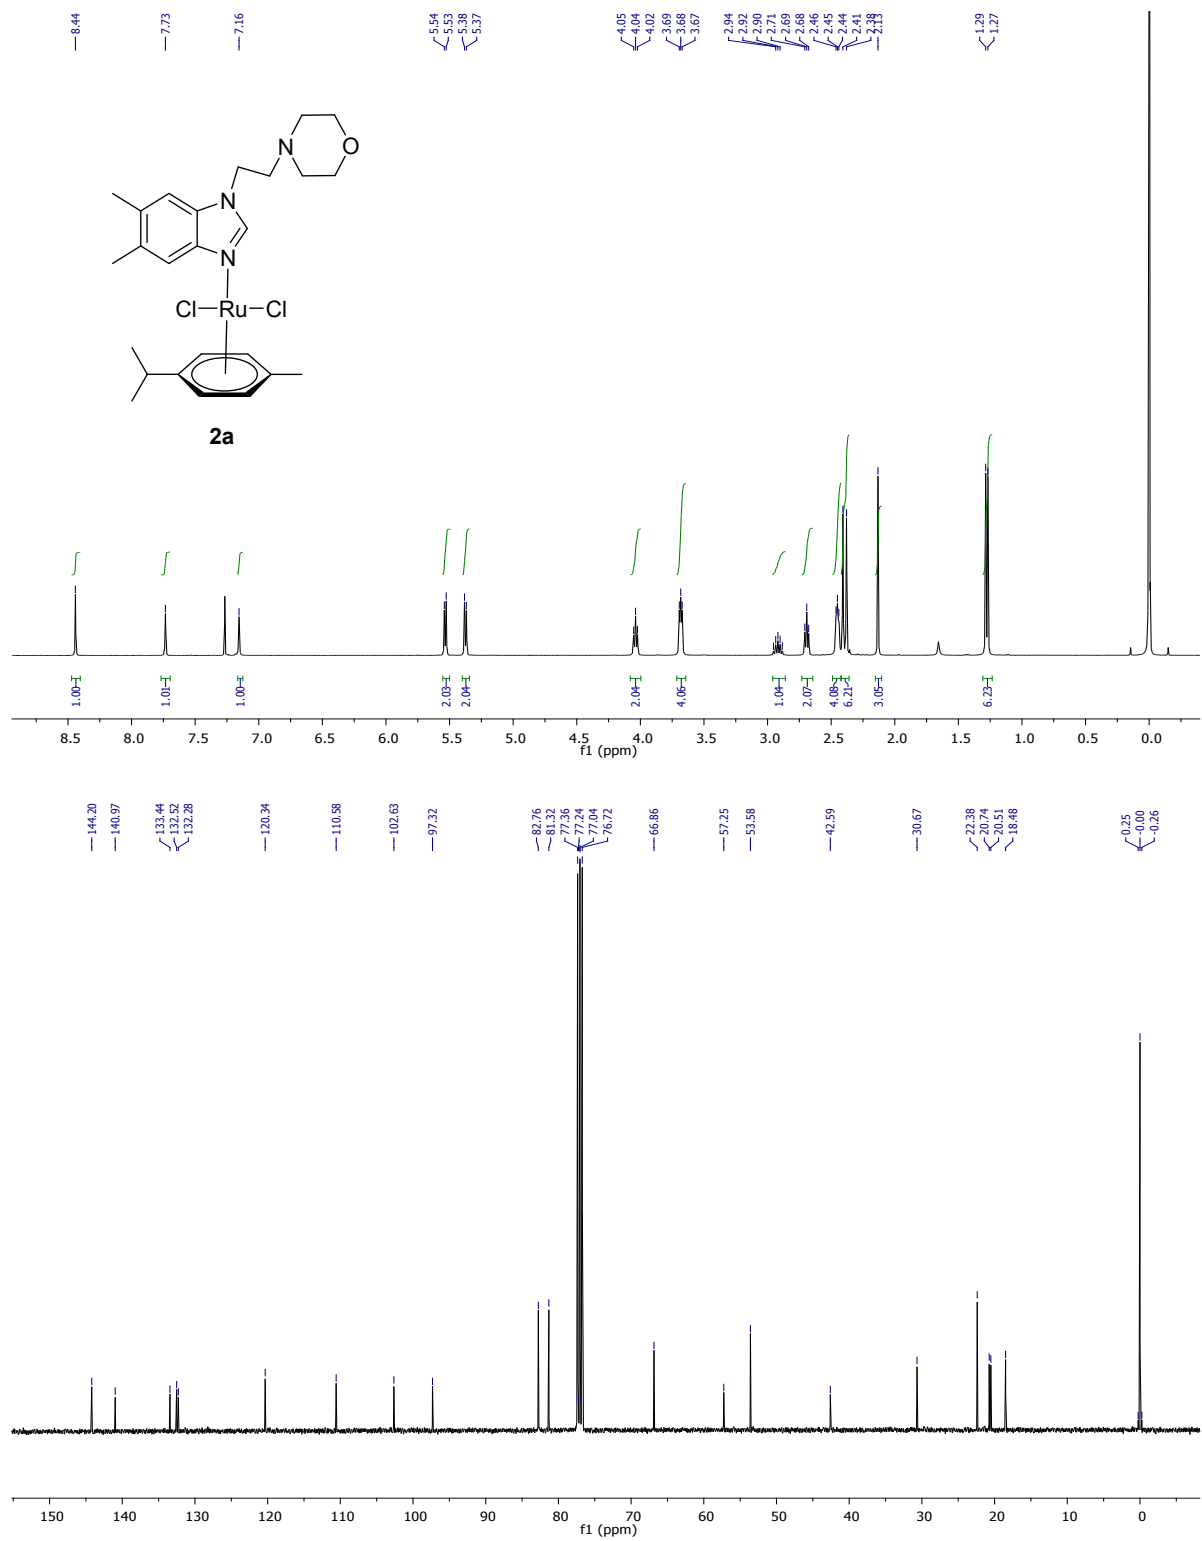

**Figure 11.**  $^1\text{H}$  and  $^{13}\text{C}$  NMR spectra of **2a**

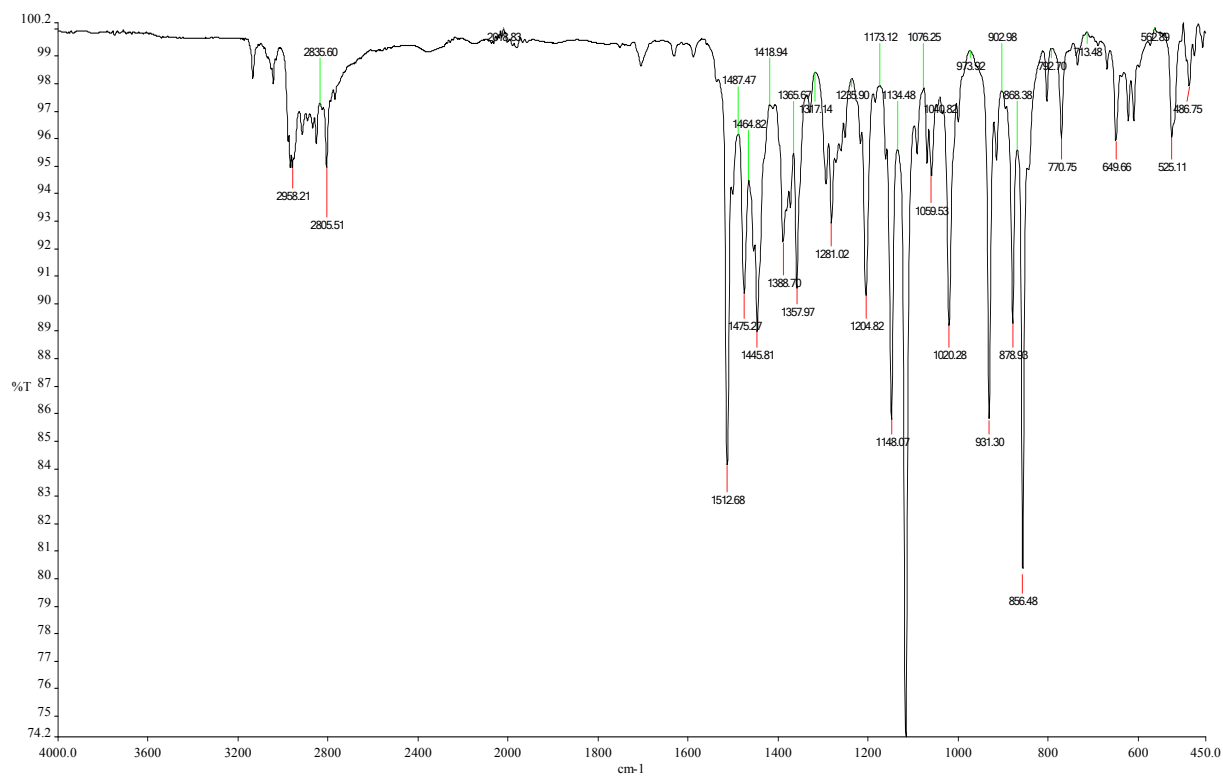

**Figure 12.** FT-IR spectrum of 2a

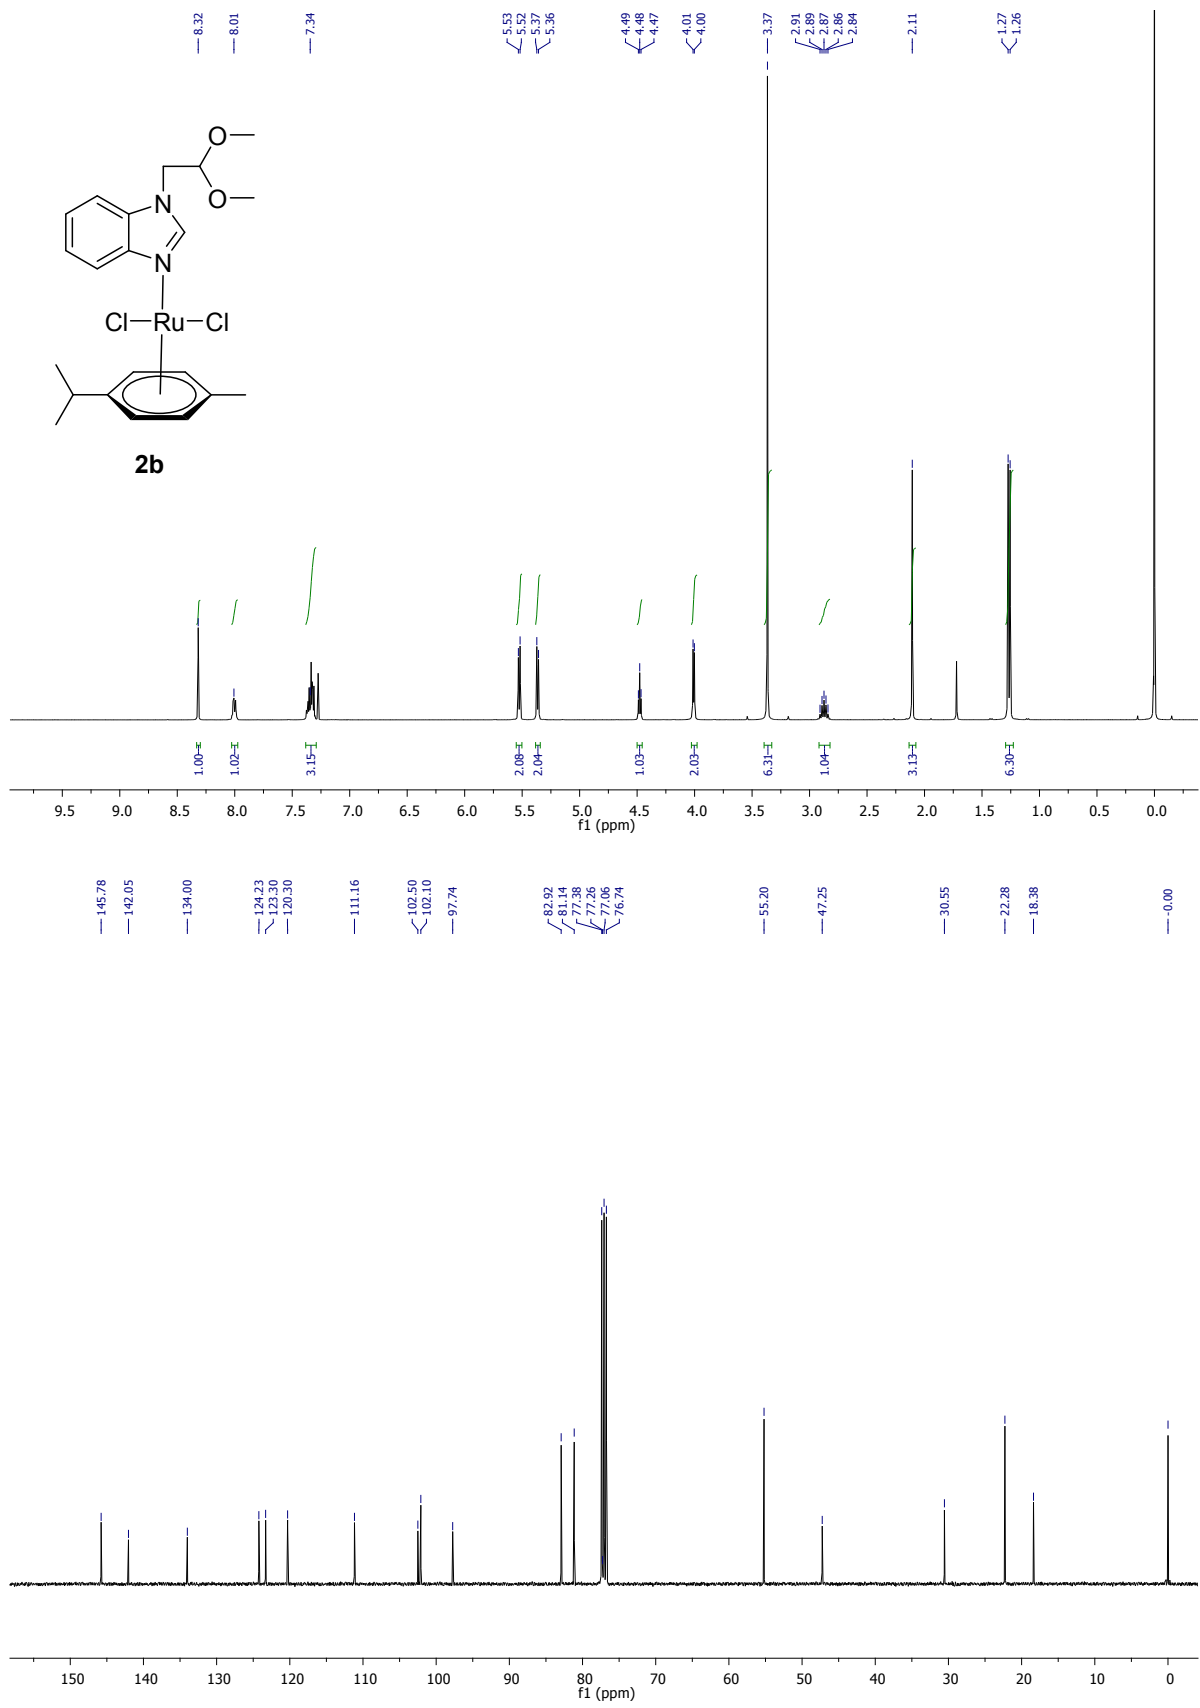

**Figure 13.** <sup>1</sup>H and <sup>13</sup>C NMR spectra of **2b**

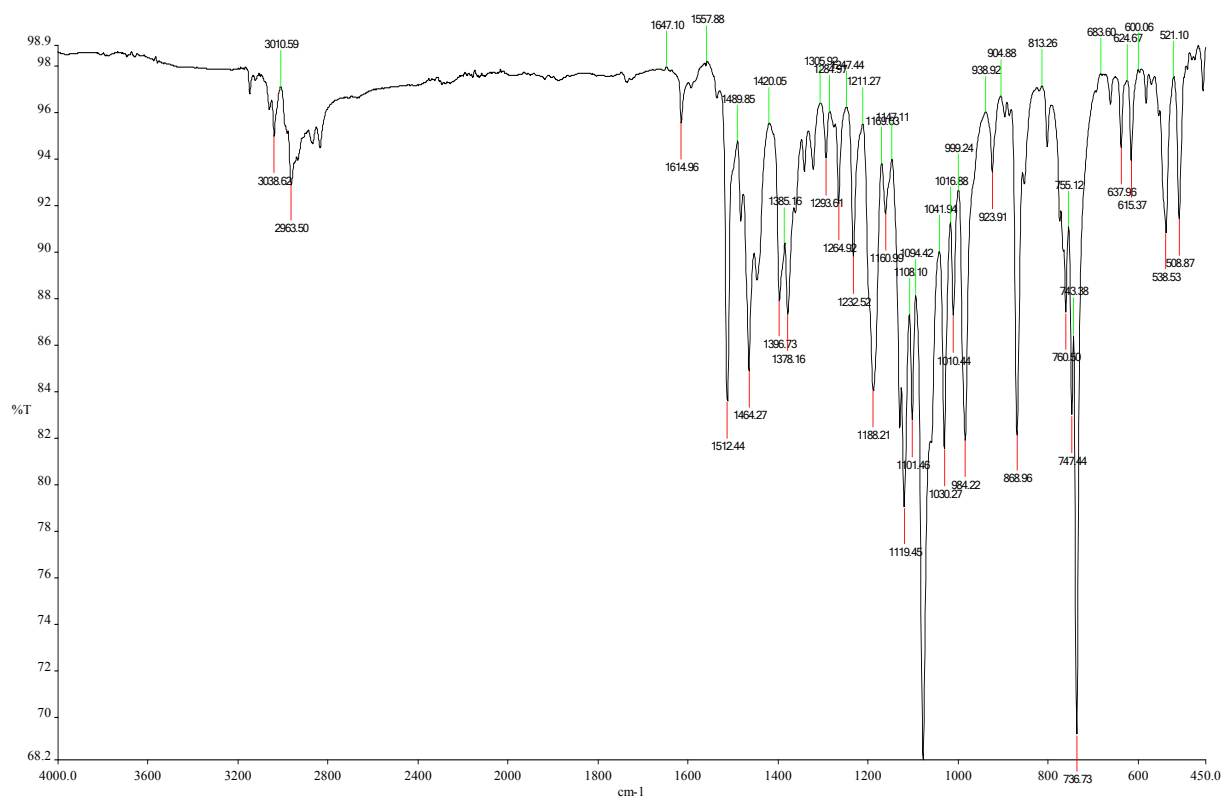

**Figure 14.** FT-IR spectrum of **2b**



2c

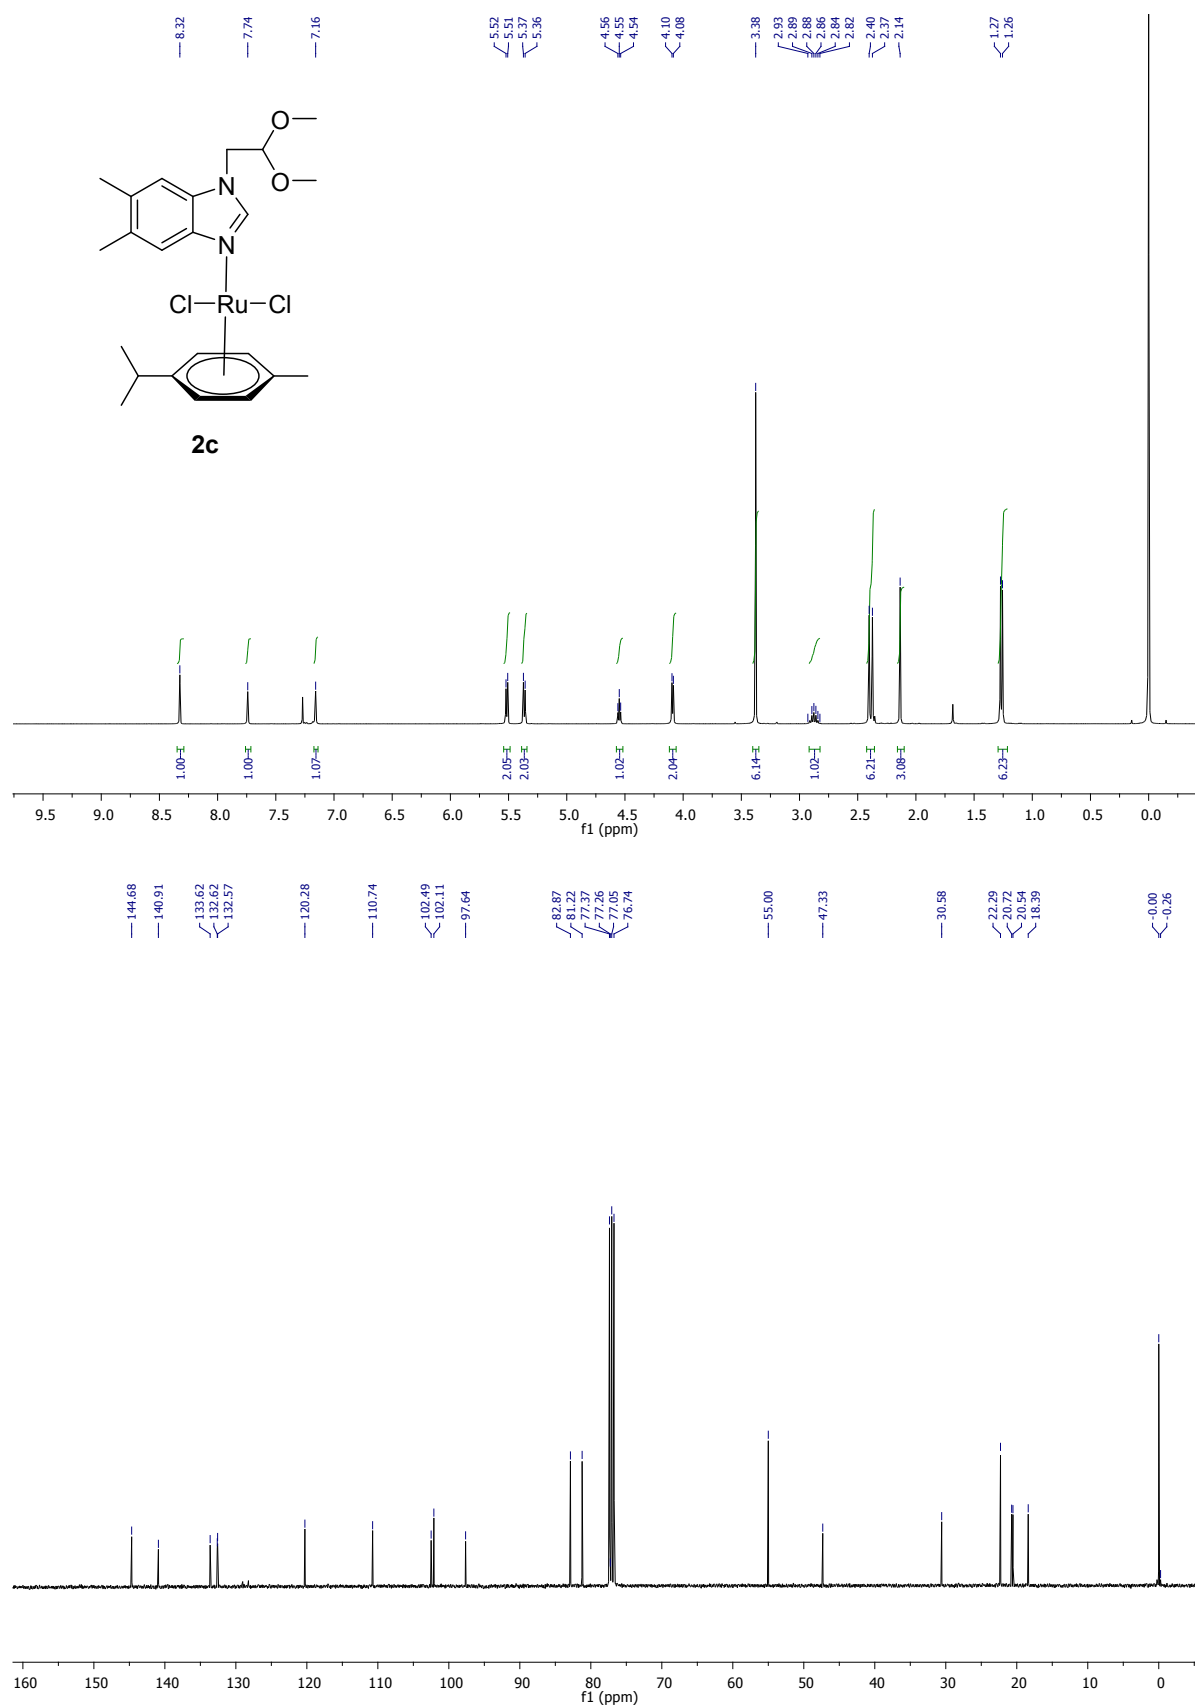

Figure 15. <sup>1</sup>H and <sup>13</sup>C NMR spectra of 2c

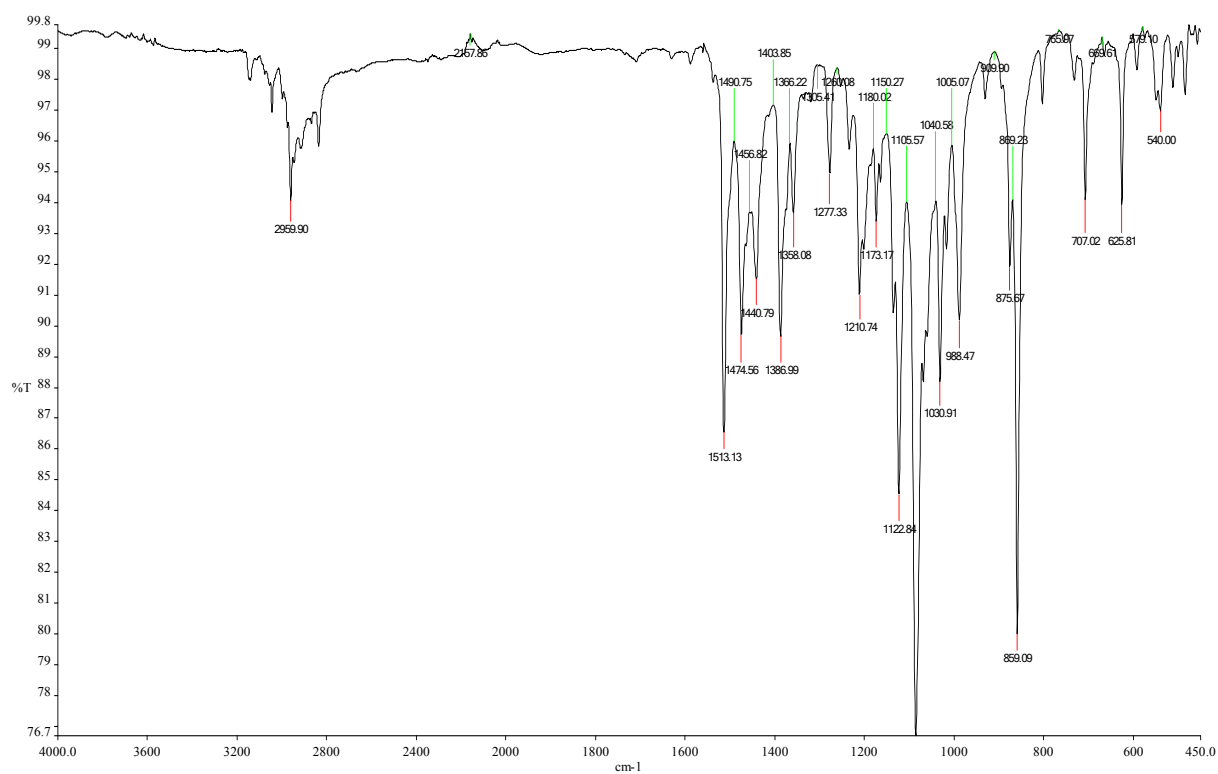

**Figure 16.** FT-IR spectrum of **2c**

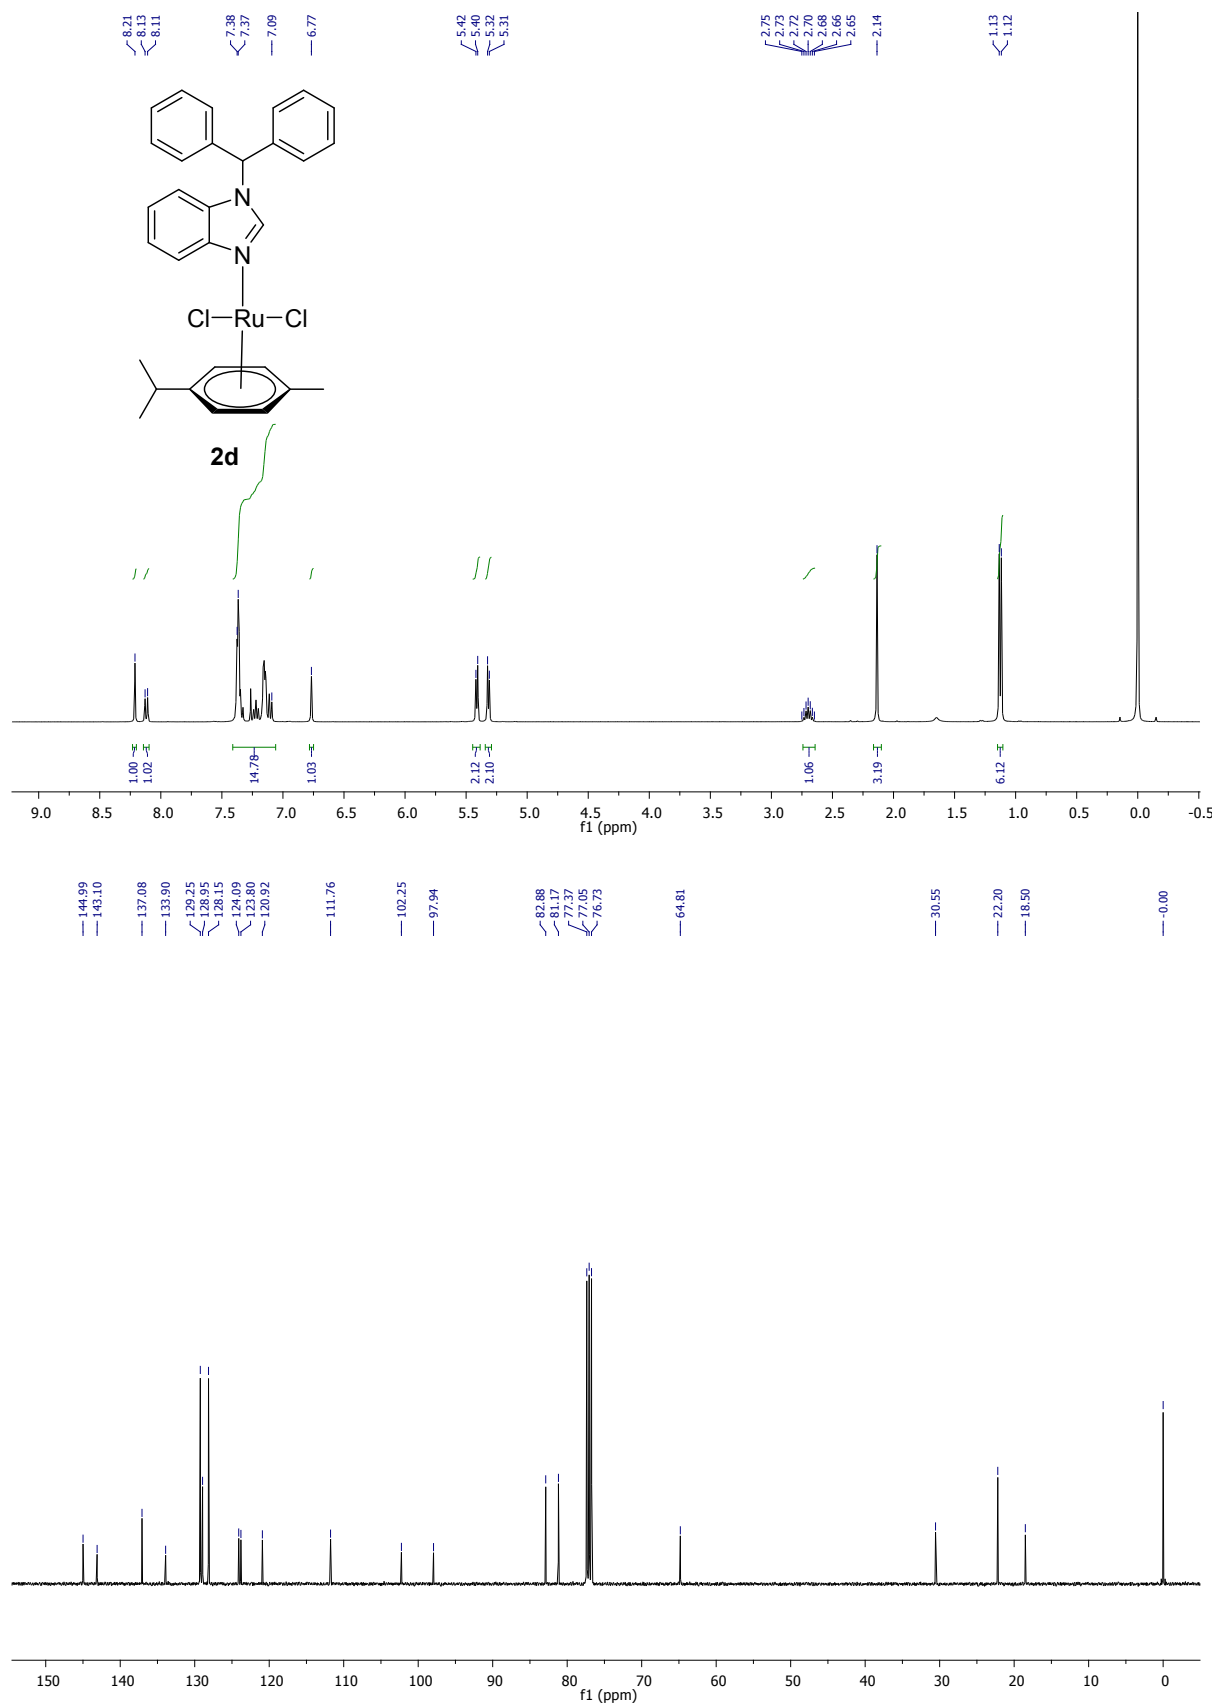

Figure 17.  $^1\text{H}$  and  $^{13}\text{C}$  NMR spectra of **2d**

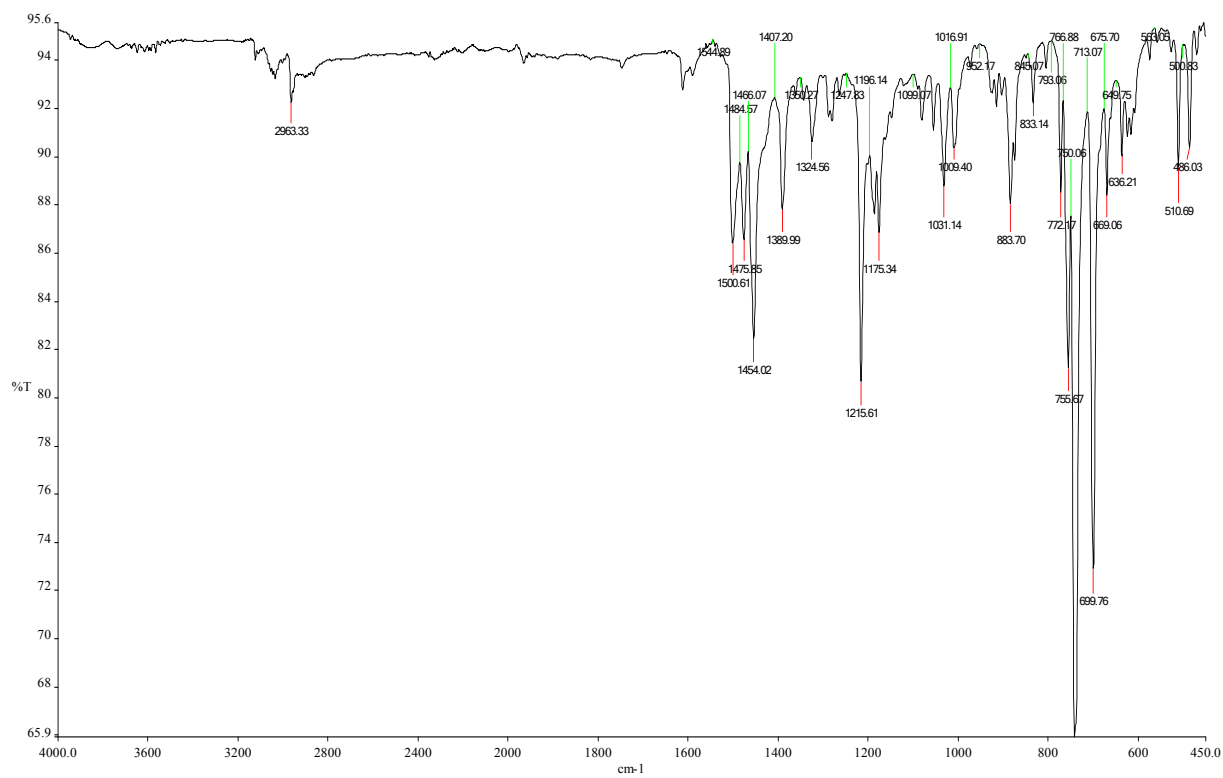

**Figure 18.** FT-IR spectrum of **2d**

2e

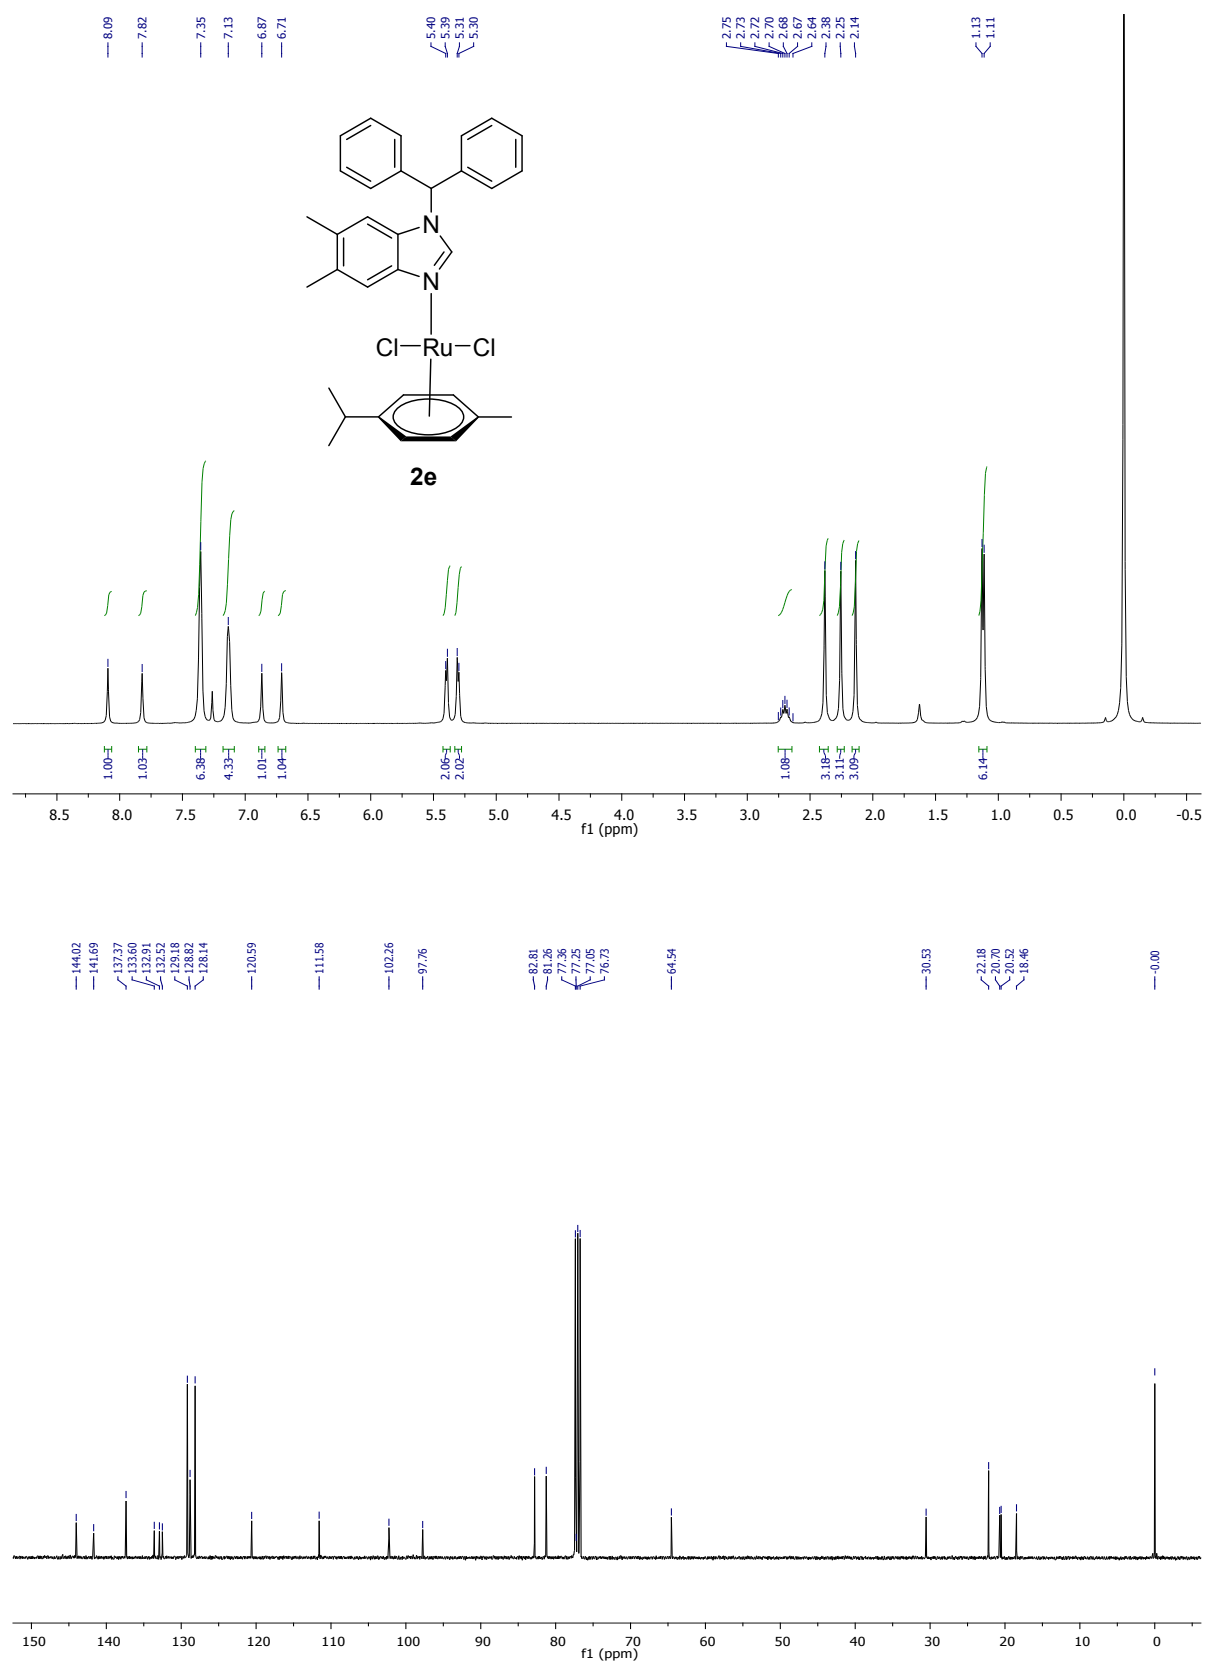

Figure 19. <sup>1</sup>H and <sup>13</sup>C NMR spectrums of 2e

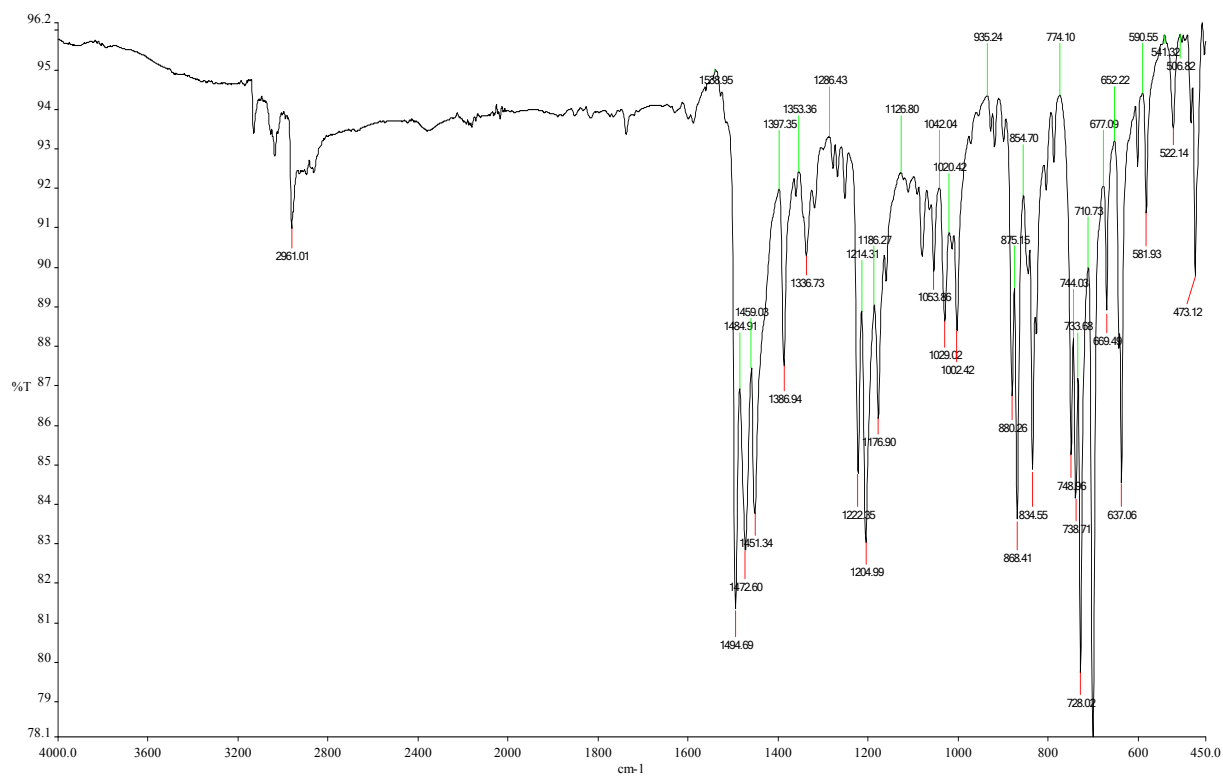

**Figure 20.** FT-IR spectrum of 2e
